# Supplementary material for: An in vivo platform to select and evolve aggregation-resistant proteins
Source: PubMed Central journal article supplement (PMC7156504; doi:10.1038/s41467-020-15667-1), 2020-04-14
Supplement: 41467_2020_15667_MOESM1_ESM.pdf [file 41467_2020_15667_MOESM1_ESM.pdf]

# **An *in vivo* platform to select and evolve aggregation resistant proteins**

## **Supplementary Information**

**Jessica S. Ebo<sup>1, 2, †</sup>, Janet C. Saunders<sup>1,3, †</sup>, Paul W. A. Devine<sup>1,3</sup>, Alice M. Gordon<sup>1,2</sup>, Amy S. Warwick<sup>1,2</sup>, Bob Schiffrin<sup>1,2</sup>, Stacey E. Chin<sup>3</sup>, Elizabeth England<sup>3</sup>, James D. Button<sup>3</sup>, Christopher Lloyd<sup>3</sup>, Nicholas J. Bond<sup>3</sup>, Alison E. Ashcroft<sup>1,2</sup>, Sheena E. Radford<sup>1,2</sup>, David C. Lowe<sup>3\*</sup>, David J. Brockwell<sup>1,2\*</sup>**

† These authors contributed equally to this work

\*Corresponding authors david.lowe@astrazeneca.com and D.J.Brockwell@leeds.ac.uk

<sup>1</sup>Astbury Centre for Structural Molecular Biology, University of Leeds, Leeds, LS2 9JT, UK

<sup>2</sup>School of Molecular and Cellular Biology, Faculty of Biological Sciences, University of Leeds, Leeds, LS2 9JT, UK

<sup>3</sup>Current address: AstraZeneca, Granta Park, Cambridge, CB21 6GH, UK



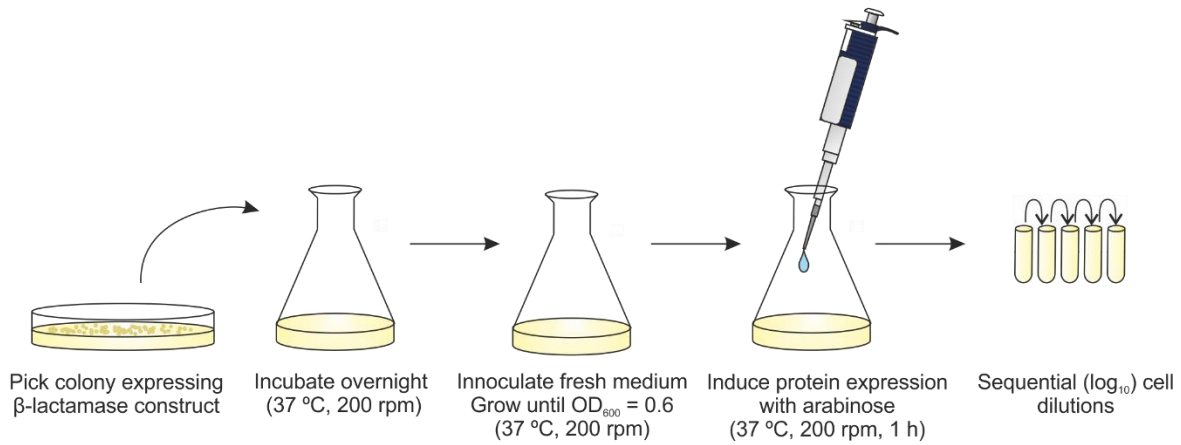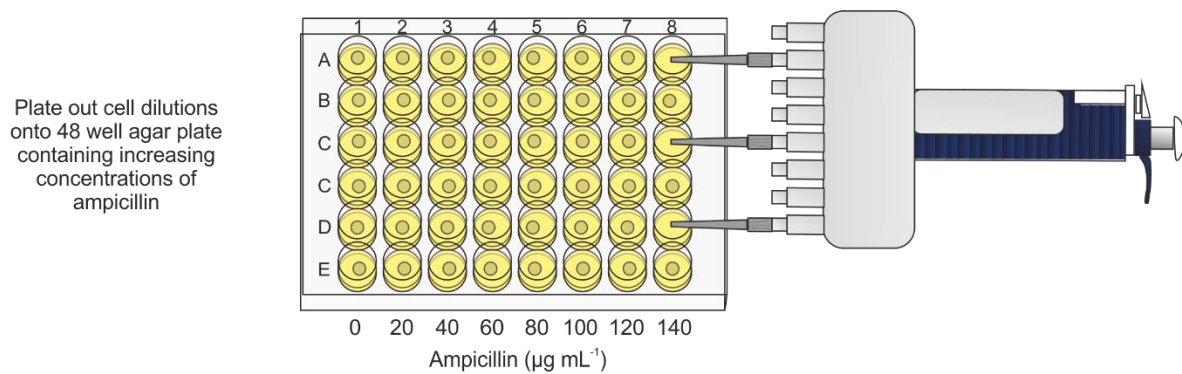

Incubate overnight 37 °C

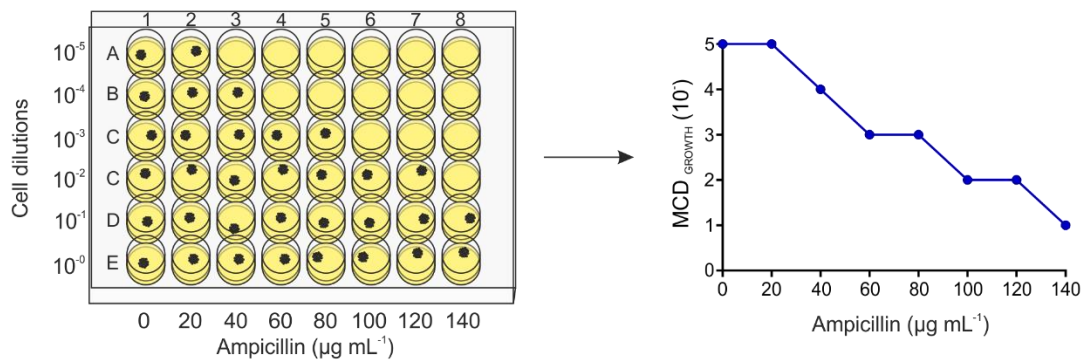

Score cells for the maximal cell dilution at which growth occurs for each ampicillin concentration

**Supplementary Figure 2.** Schematic of the *in vivo* growth assay. Colonies transformed with the  $\beta$ -lactamase fusion construct are cultured until an  $OD_{600}$  of 0.6 is reached.  $\beta$ -lactamase expression is induced by the addition of arabinose and cells then incubated at 37 °C for 1 h at 200 rpm. Cultures are serially diluted into 170 mM sodium chloride and 3  $\mu\text{L}$  pipetted onto each well of the prepared agar plates with increasing concentrations of ampicillin in each column. Plates are incubated for 18 h at 37 °C. The maximal cell dilution at which growth occurs ( $MCD_{\text{GROWTH}}$ ) is scored by visual inspection (where growth is scored as positive when > 10 individual colonies are visible on the plate).

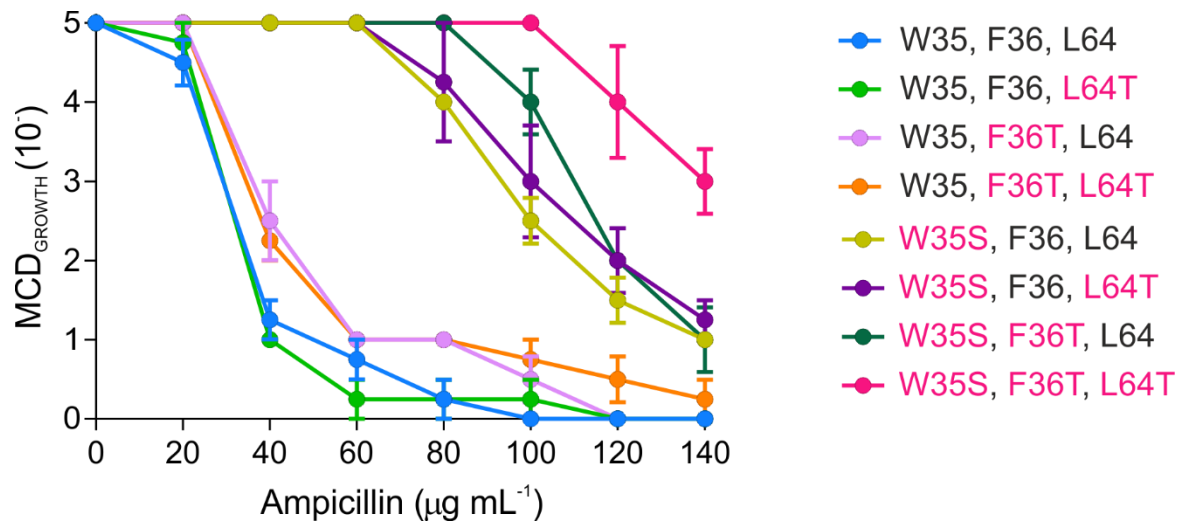

**Supplementary Figure 3.** *In vivo* growth curves of  $\beta$ La-scFv variants containing WFL, STT, or one, two or all three amino acid substitutions between WFL and STT. Pink font indicates mutations away from WFL. Error bars represent s.e.m ( $n = 4$  biologically independent experiments). Source data are provided as a Source Data file.

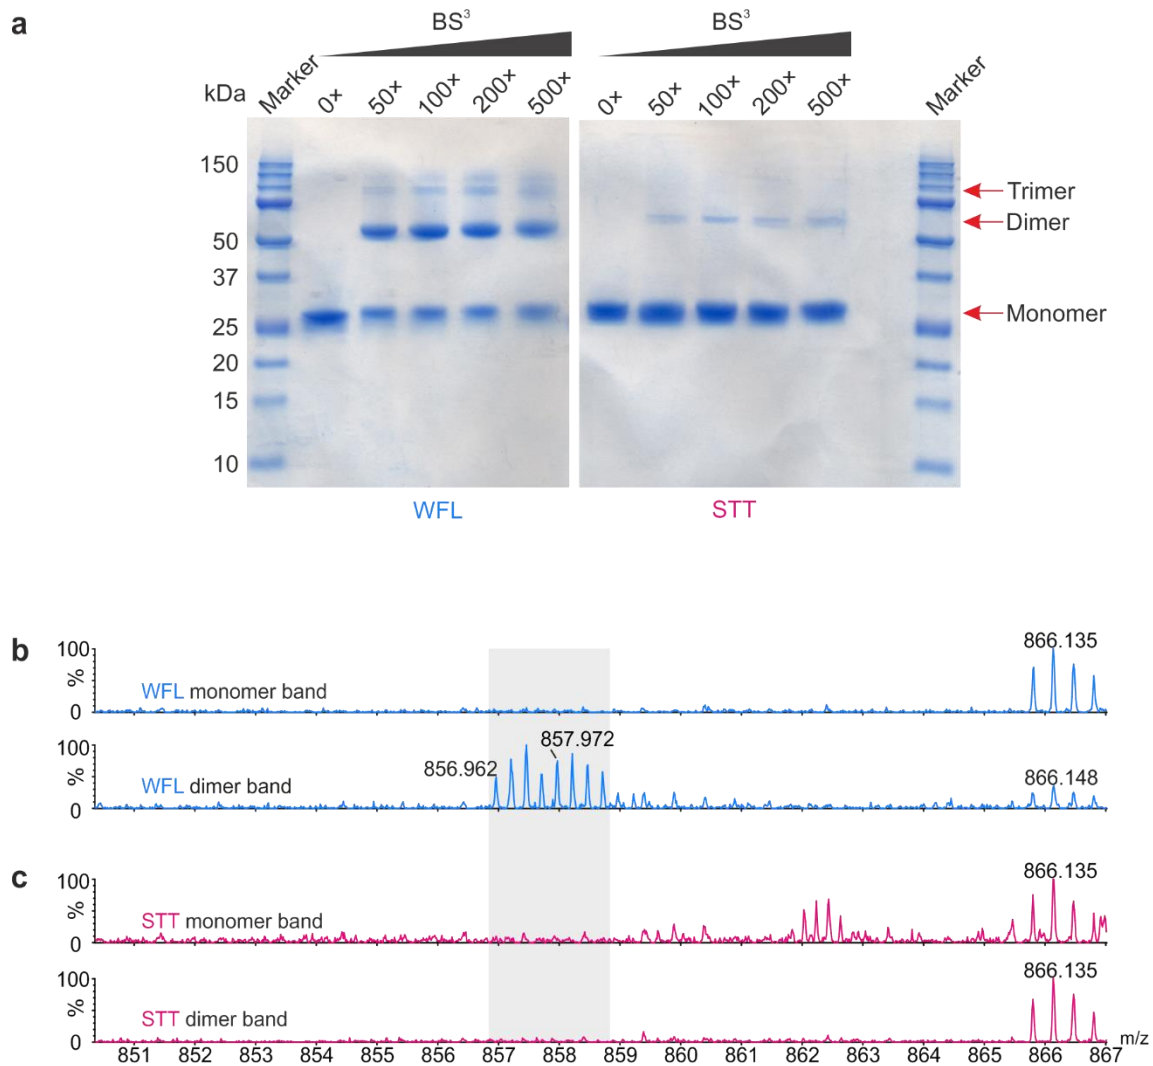

**Supplementary Figure 4.** Chemical cross-linking and digestion of scFvs. **(a)** Chemical cross-linking of scFvs WFL and STT as a function of BS<sup>3</sup> concentration (0–500-fold molar excess over [scFv]). Mass spectra of digests from the excised monomer or dimer bands of **(b)** scFv<sub>WFL</sub>, and **(c)** scFv<sub>STT</sub>. The cross-link unique to WFL is labelled at 856.96 m/z. Note that few, if any, peptides could be identified for scFv<sub>STT</sub> consistent with their reduced aggregation propensity. scFv<sub>WFL</sub> reveals the same, unique cross-linked peptide MQVQLVQSGAEVK (V<sub>H</sub>) and LLIYDNNKRPSGIPDR (V<sub>L</sub>) (**Supplementary Fig. 5**) identified in IgG<sub>WFL</sub> (previously named MEDI1912)<sup>1</sup>. Source data are provided as a Source Data file.

**Supplementary Figure 5.** MS/MS sequencing data of the isolated cross-linked peptide (856.96 m/z) from the digested dimer band of cross-linked scFv<sub>WFL</sub> in **Supplementary Figure 4b**. The two cross-linked peptides MQVQLVQSGAEVK (V<sub>H</sub>) and LLIYDNNKRPSGIPDR (V<sub>L</sub>) are labelled as alpha (green) and beta (blue), respectively with the identified  $\gamma$ -ions highlighted below.

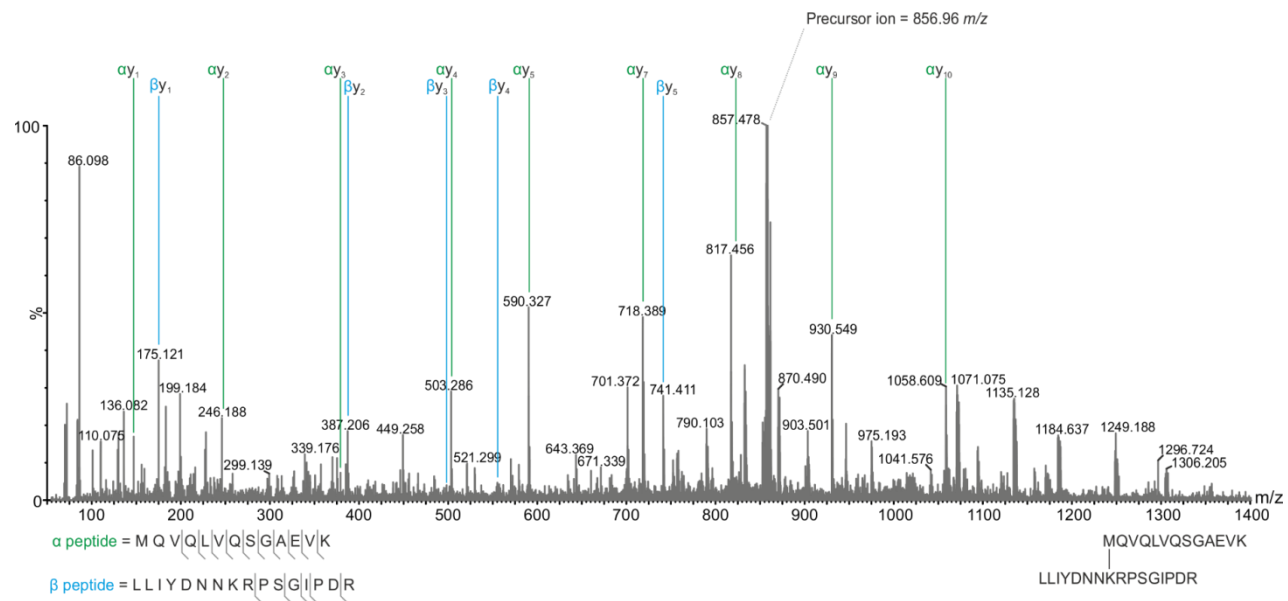

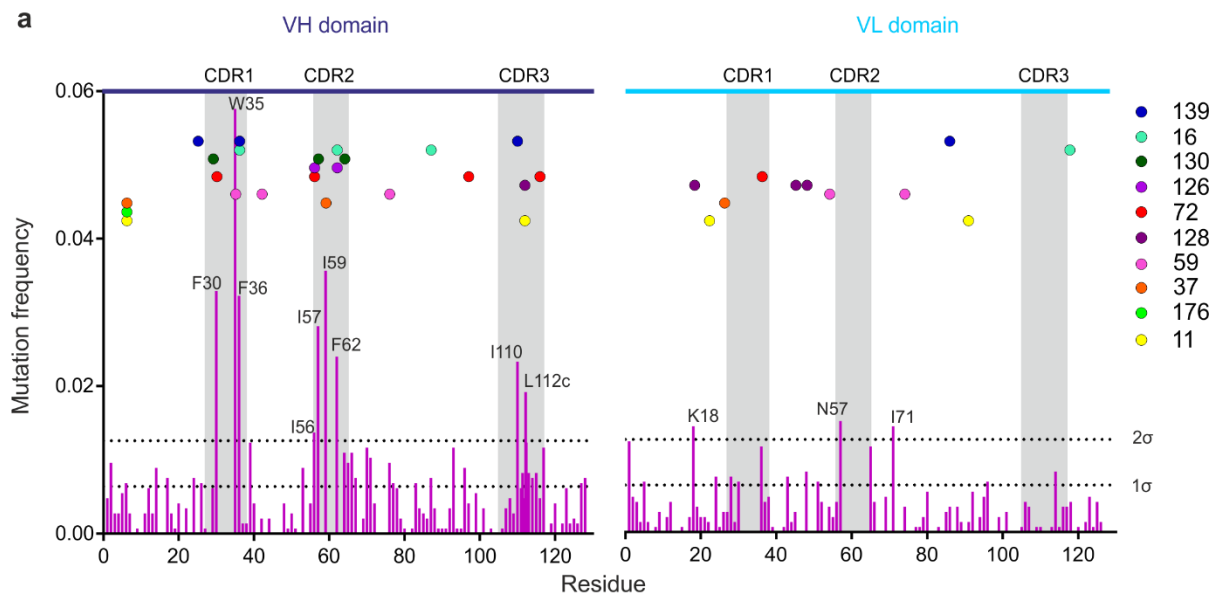

**b**

| Variant    | Mutation(s)                                                                                                         |
|------------|---------------------------------------------------------------------------------------------------------------------|
| <b>139</b> | S25G (V <sub>H</sub> ) F36S(V <sub>H</sub> ) I110T (V <sub>H</sub> ) S86T (V <sub>L</sub> )                         |
| <b>16</b>  | F36S (V <sub>H</sub> ) F62S (V <sub>H</sub> ) V87A (V <sub>H</sub> ) F118I (V <sub>L</sub> )                        |
| <b>130</b> | T29A (V <sub>H</sub> ) I57T (V <sub>H</sub> ) L64H (V <sub>H</sub> )                                                |
| <b>126</b> | I56F (V <sub>H</sub> ) F62S (V <sub>H</sub> )                                                                       |
| <b>72</b>  | F30S (V <sub>H</sub> ) I56T (V <sub>H</sub> ) E97D (V <sub>H</sub> ) D116G (V <sub>H</sub> ) N36D (V <sub>L</sub> ) |
| <b>128</b> | Y112D (V <sub>H</sub> ) K18E (V <sub>L</sub> ) L45P (V <sub>L</sub> ) T48A (V <sub>L</sub> )                        |
| <b>59</b>  | W35R (V <sub>H</sub> ) V42A (V <sub>H</sub> ) V76A (V <sub>H</sub> ) I54T (V <sub>L</sub> ) D74G (V <sub>L</sub> )  |
| <b>37</b>  | Q6P (V <sub>H</sub> ) I59T (V <sub>H</sub> ) S26P(V <sub>L</sub> )                                                  |
| <b>176</b> | Q6R (V <sub>H</sub> )                                                                                               |
| <b>11</b>  | Q6R (V <sub>H</sub> ) T112bA (V <sub>H</sub> ) S22P (V <sub>L</sub> ) I91V (V <sub>L</sub> )                        |

**Supplementary Figure 6.** Location and identity of substituted residues within the ten evolved IgGs selected for biophysical characterisation compared with mutational frequency of each residue in the  $\beta$ La-scFv<sub>WFL</sub>\* library. **(a)** Location of amino acid substitutions (showed by filled circles) in each of the 10 selected constructs (coloured according to the key), overlaid on the mutational frequency graph of the screened  $\beta$ La-scFv<sub>WFL</sub>\* library. **(b)** Inventory of the substitutions found in the ten constructs selected for *in vitro* analysis (see Fig. 3a). The variant names are coloured as in (a).

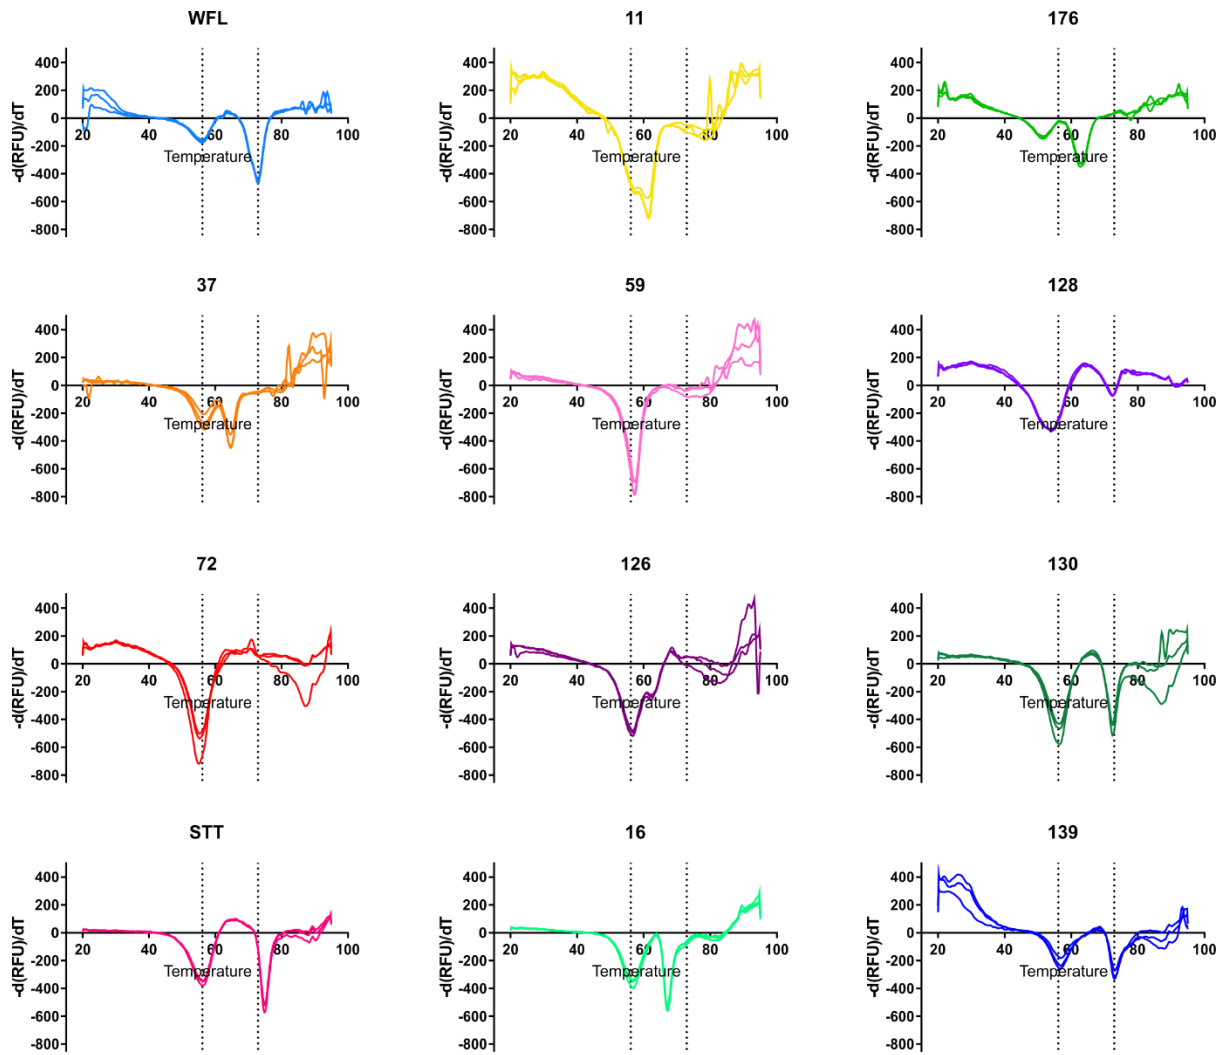

**Supplementary Figure 7.** Thermal stability of IgG<sub>WFL</sub>, IgG<sub>STT</sub> and the ten evolved variants selected for study measured by differential scanning fluorimetry (DSF). Triplicate biological repeat data are presented as first derivatives of relative fluorescence units (RFU) versus temperature (°C). Graphs are arranged by increasing *in vivo* growth assay score from top left to bottom right. The T<sub>m</sub> values of IgG<sub>WFL</sub> (56 and 73 °C) are shown on all plots as dotted lines to enable comparison of the data. T<sub>m</sub> values are listed in **Supplementary Table 1**. Source data are provided as a Source Data file.



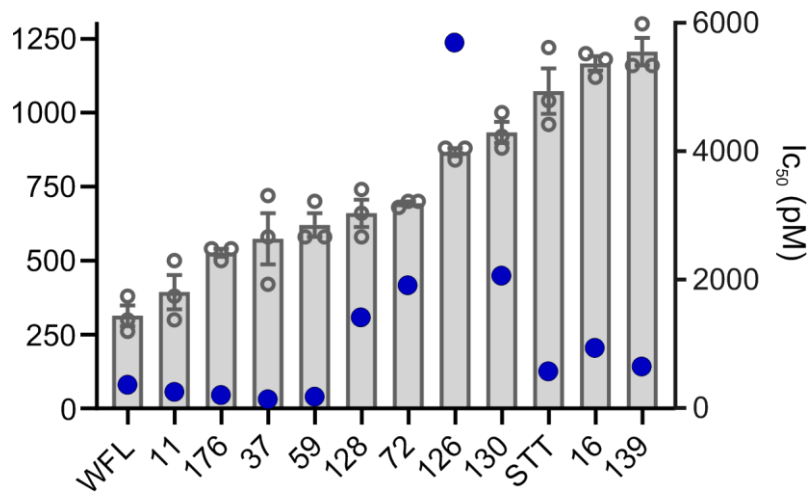

**Supplementary Figure 8.** *In vivo* growth scores of  $\beta$ la-scFv<sub>WFL</sub> variants (bars). Error bars indicate s.e.m (n = 4 biologically independent experiments) overlaid with IC<sub>50</sub> values (blue circles). Note that the error bars for the IC<sub>50</sub> values are smaller than the symbol (n = 3 technical repeats)).

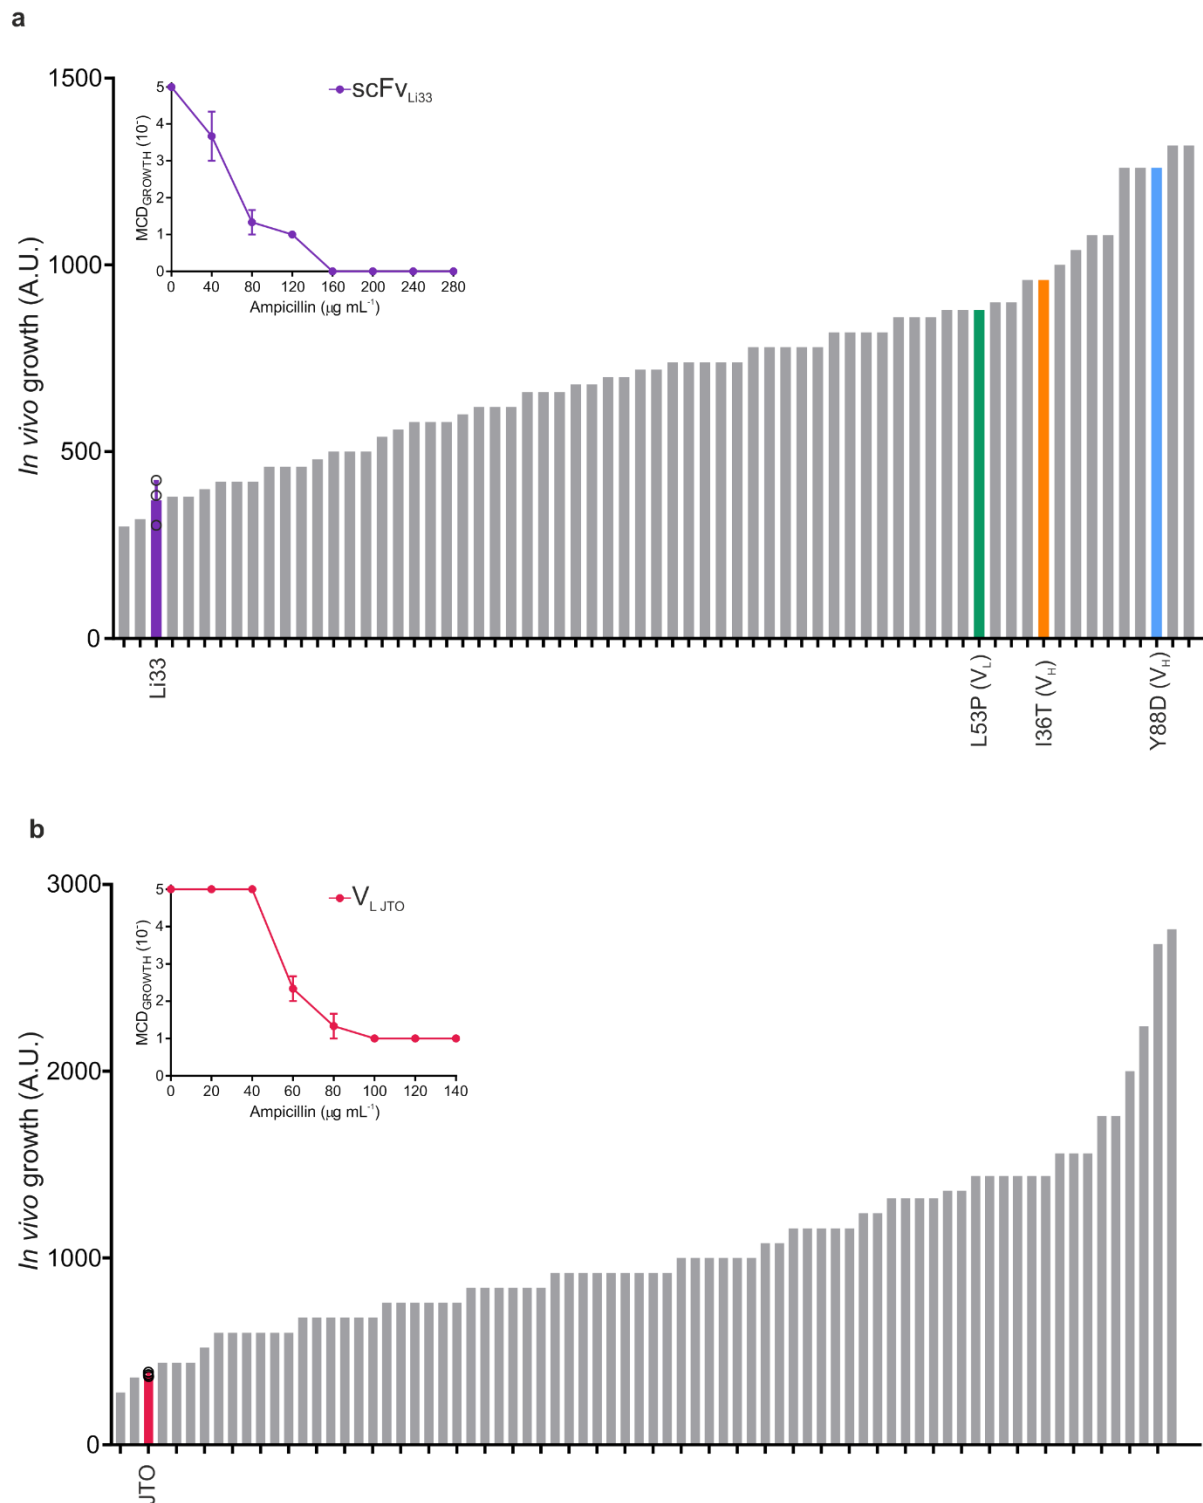

**Supplementary Figure 9.** *In vivo* growth scores of evolved scFv<sub>Li33</sub> and JTO. **(a)** *In vivo* growth scores of 66 evolved βLa-scFv<sub>Li33</sub> variants. Wild-type scFv<sub>Li33</sub> together with the frequently mutated ‘hotspot’ residues L53P (V<sub>L</sub>), I36T (V<sub>H</sub>) and the highest scoring single point mutation, Y88D (V<sub>H</sub>) are highlighted. The full *in vivo* growth curve for wild-type βLa-scFv<sub>Li33</sub> is shown inset. Error bars = s.e.m (n = 3 biologically independent experiments). **(b)** *In vivo* growth scores of 75 evolved βLa-JTO variants (JTO highlighted). The full *in vivo* growth curve for wild-type βLa-JTO is shown inset. Initial selection for both constructs was performed at 140 µg/mL ampicillin. Error bars = s.e.m (n = 3 biologically independent experiments). Source data are provided as a Source Data file.

### Heavy chain

```

IgGWFL 1 QVQLVQSGA○EVKKPGSSVKVSCKASGGTF○○○WFGAFTWVRQAPGQGLEWMGGIIP I○
IgGLi33 E---LE--G○GLVQ--G-LRL--A---F--○○○SIYPMF-----K----VSW-G-S○

IgGWFL 61 ○FGLTNLAQNFQ○GRVTITADESTSTVYME LSSLRSED TAVYYC CARSSRIYDLNPSLTAY
IgGLi33 ○G-I-KY-DSVK○--F--SR-N-KN-L-LQMN---A-----T-----EGHN○○○○○○○D
                                         abcddcba

IgGWFL 113 YDMDVWGQGMVTVSS
IgGLi33 120 WYF-L--R--L-----

```

### Light chain

```

IgGWFL 1 QSVLTQPPS○VSAAPGQKVTISCSGSSSDI○○○GNNYVSWYQQLPGTAPKLLIYDN○○○
IgGLi33 DIQM--S-GTL-LS--ERA-L--RA-Q-V○○○○○SS-LA----K--Q--R-----A○○○

IgGWFL 61 ○○○NKRPSGIP○DRFSGSK○○SGTSATLGITGLQTGDEADYYC GTWDSS○LSAWVFGG
IgGLi33 ○○○SN-AT---○A-----G○---EF--T-SS--SE-F-V---QQYDK○○○○VPLT---

IgGWFL 121 GTKLTVL
IgGLi33 ---VEIK

```

**Supplementary Figure 10.** Sequence alignment of V<sub>H</sub> and V<sub>L</sub> domains of IgG<sub>WFL</sub> and IgG<sub>Li33</sub>. Dash '-' represents identical residues. Open circle 'o' denotes IMGT numbering gaps. CDRs are highlighted in blue.

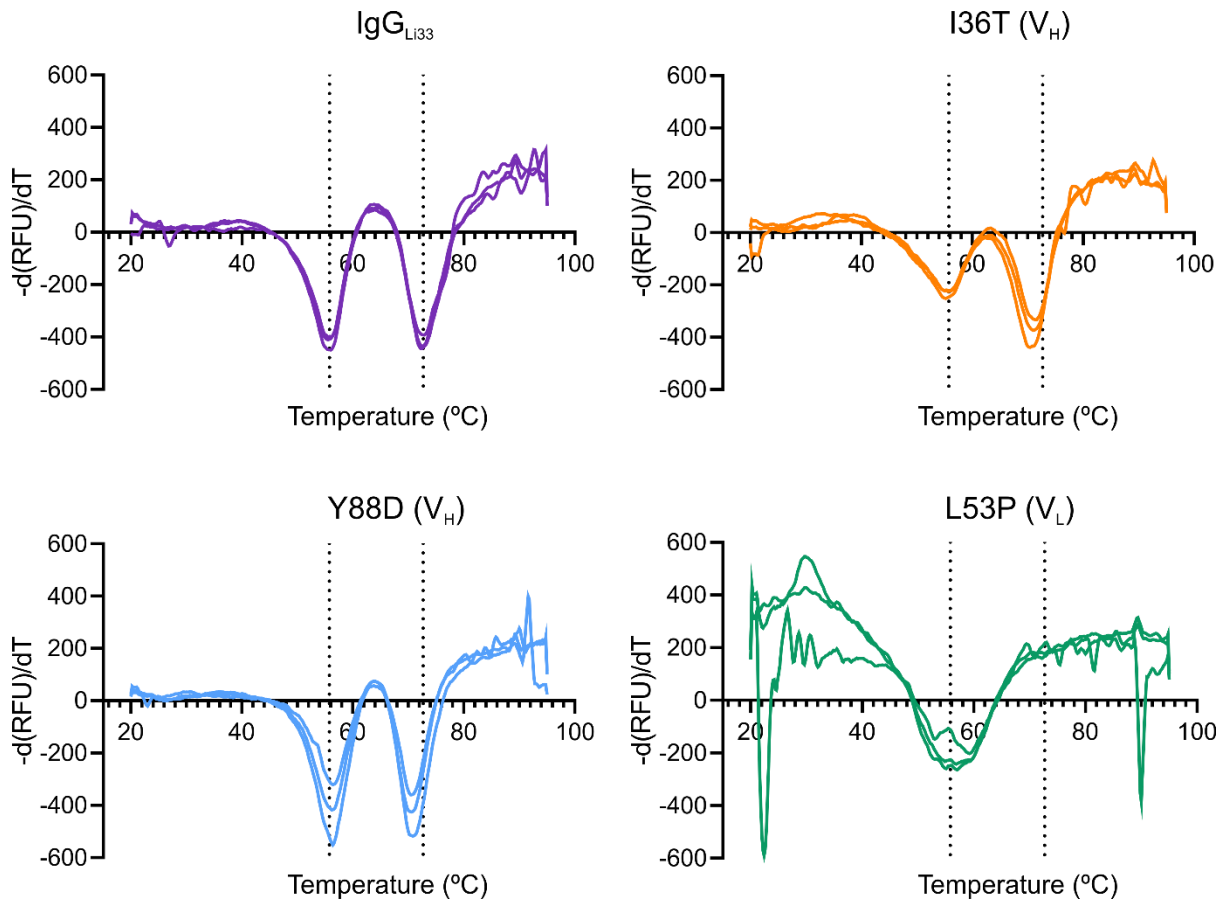

**Supplementary Figure 11.** Thermal stability of  $\text{IgG}_{\text{L133}}$  and the three evolved variants selected for study measured by DSF. Triplicate biological repeat data are presented as first derivatives of relative fluorescence units (RFU) versus temperature ( $^{\circ}\text{C}$ ). Graphs are arranged by increasing *in vivo* growth assay score from top left to bottom right. The thermal unfolding transitions of  $\text{IgG}_{\text{L133}}$  (56 and 73  $^{\circ}\text{C}$ ) are shown on all plots as dotted lines to enable comparison of the data.  $T_m$  values are listed in **Supplementary Table 1**. Source data are provided as a Source Data file.

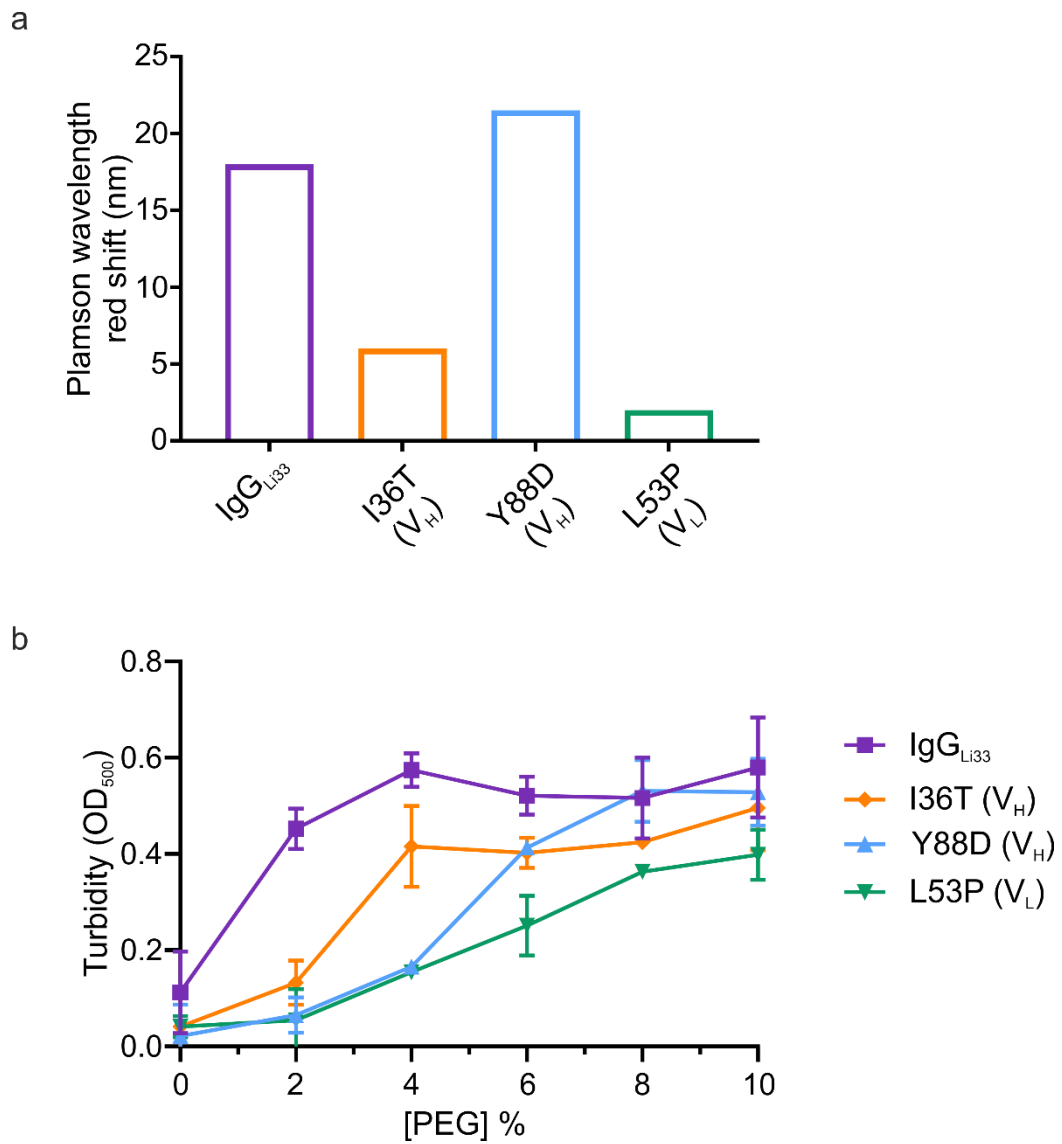

**Supplementary Figure 12.** Biophysical assessment of IgG<sub>Li33</sub> evolved variants (a) AC-SINS data of IgG<sub>Li33</sub> show that two out of three evolved IgGs have reduced self-association propensity compared with wild-type IgG<sub>Li33</sub>. (b) Polyethylene glycol (PEG) precipitation of IgG<sub>Li33</sub> and three evolved variants quantified by turbidity at 500 nm showing that the evolved IgGs have increased solubility compared with wild-type IgG<sub>Li33</sub>. Error bars = SD (n = 3 technical repeats). Source data are provided as a Source Data file.

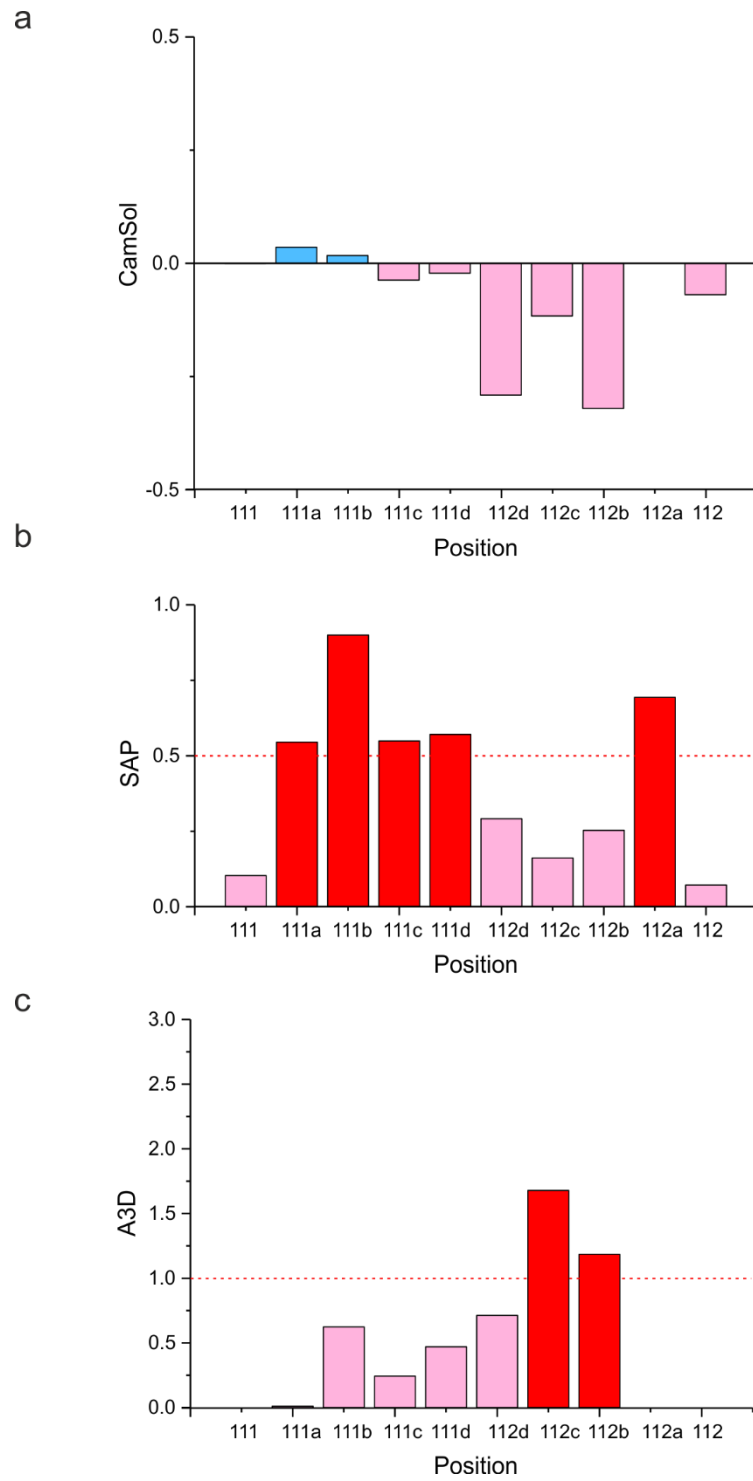

**Supplementary Figure 13.** Data from Fig. 5b showing an expanded view of residues 111-112 in CDR3 (V<sub>H</sub>), IMGT numbering. Source data are provided as a Source Data file.

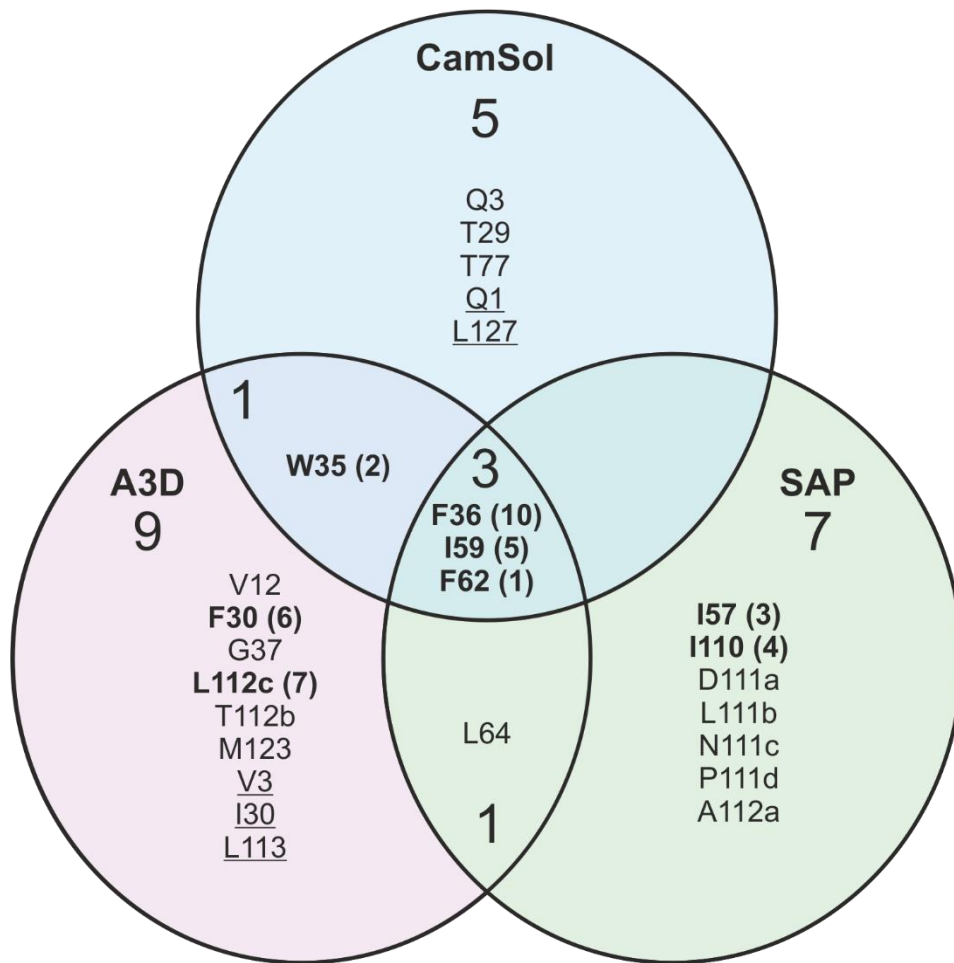

**Supplementary Figure 14.** Comparison of aggregation prone/insoluble residues identified by CamSol, Aggrescan3D and SAP. Residues were identified as aggregation prone/insoluble from CamSol (output score < -1), Aggrescan3D (> 1) or SAP (> 0.5). V<sub>L</sub> domain residues are underlined. Residues in bold are those identified as hotspots using the TPBLA. The number in brackets corresponds to the rank in aggregation propensity based on the *in vivo* growth score when introduced as single substitutions (see **Supplementary Fig. 15**).

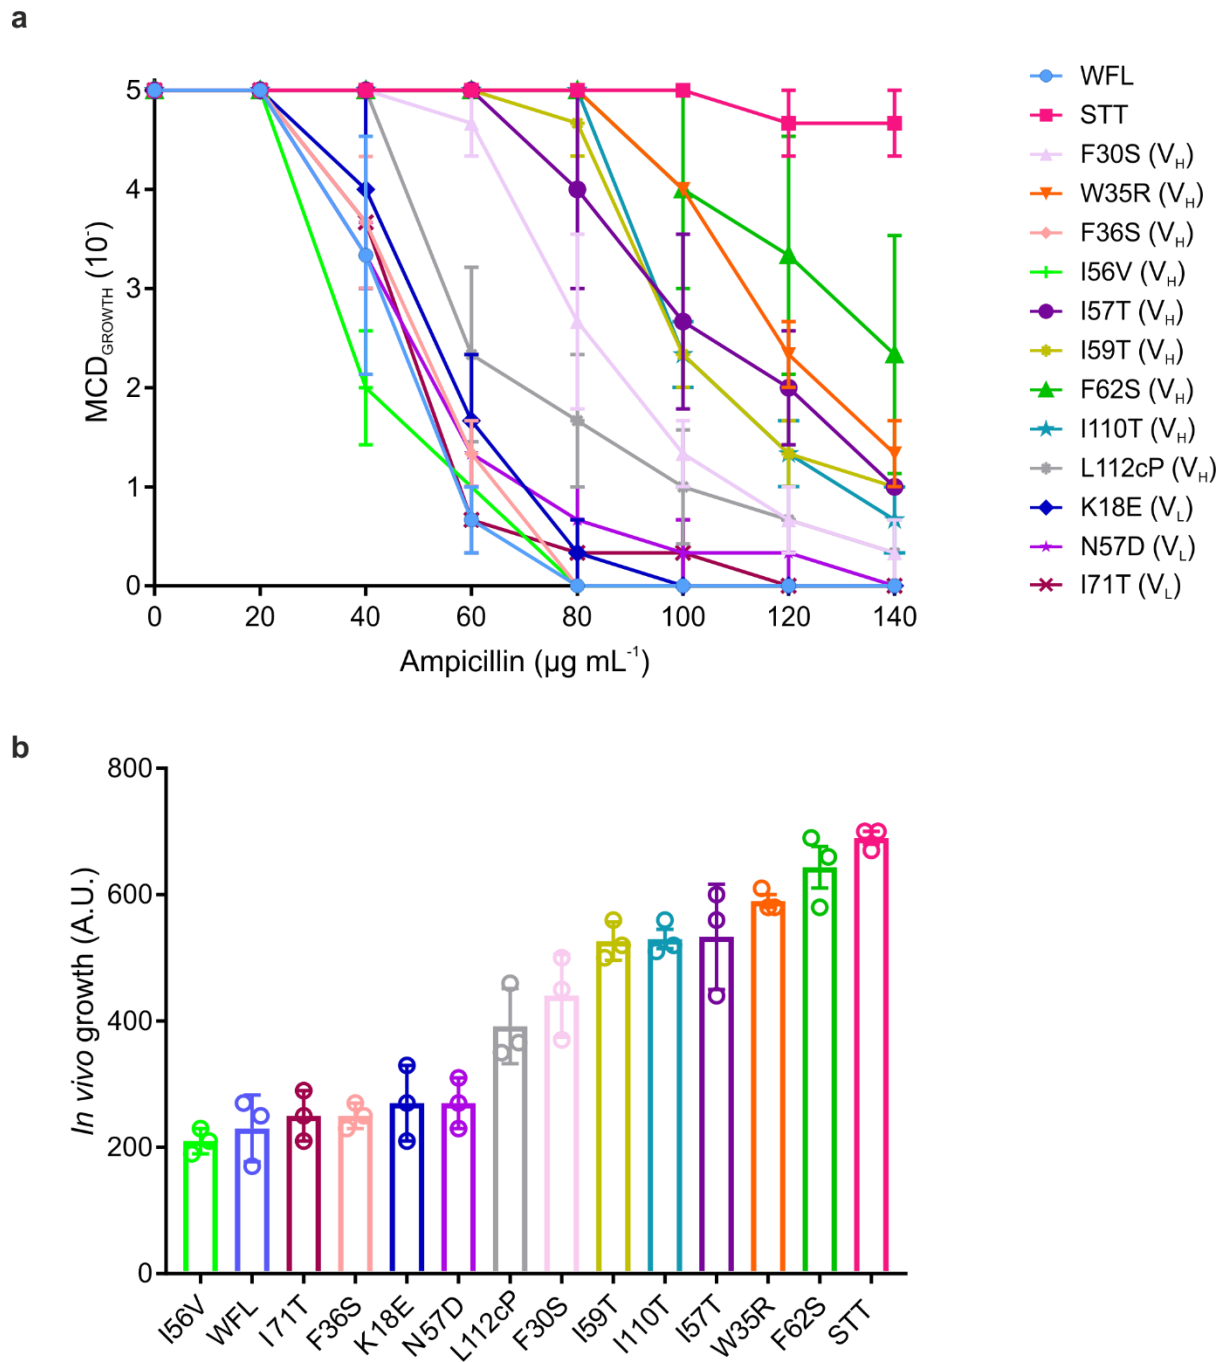

**Supplementary Figure 15.** *In vivo* growth assay of the twelve hotspot residues in  $\beta$ La-scFV<sub>WFL</sub> containing the most commonly substituted amino-acid. (a) Survival curves of each variant. (b) Area under the curve scores for each variant calculated from the data in (a). Error bars indicate the standard error of the mean (n = 3 biologically independent experiments). Source data are provided as a Source Data file.



### Supplementary Tables

| IgG  |           | Tm1 (°C)   | Tm2 (°C)   |
|------|-----------|------------|------------|
| WFL  | WT (WFL)  | 56.1 ± 0.1 | 72.9 ± 0.1 |
|      | 11        | 57.4 ± 0.0 | 61.3 ± 0.1 |
|      | 176       | 51.5 ± 0.2 | 62.8 ± 0.0 |
|      | 37        | 56.7 ± 0.2 | 64.6 ± 0.0 |
|      | 59        | 57.3 ± 0.1 | *          |
|      | 128       | 54.1 ± 0.1 | 72.4 ± 0.0 |
|      | 72        | 55.2 ± 0.0 | *          |
|      | 126       | 56.7 ± 0.1 | 62.1 ± 0.1 |
|      | 130       | 56.4 ± 0.2 | 72.4 ± 0.0 |
|      | STT       | 56.3 ± 0.1 | 74.8 ± 0.0 |
|      | 16        | 56.8 ± 0.0 | 67.2 ± 0.0 |
|      | 139       | 56.8 ± 0.0 | 73 ± 0.0   |
| Li33 | WT (Li33) | 55.8 ± 0.4 | 72.7 ± 0.8 |
|      | Y88D      | 56.2 ± 0.2 | 71.2 ± 0.9 |
|      | I36T      | 55.8 ± 0.4 | 71.0 ± 0.7 |
|      | L53P      | 55.5 ± 1.1 | *          |

**Supplementary Table 1:** Thermal stabilities of IgG<sub>WFL</sub>, IgG<sub>Li33</sub> and their variants showing transition mid-point temperatures (Tm1 and Tm2) from first and second peaks of first derivative DSF measurements. Errors represent SD (n = 3 biological repeats). \* = only one transition temperature detected. Thermal unfolding profiles for each variant are shown in **Supplementary Figures 7 and 11** for IgG<sub>WFL</sub> and IgG<sub>Li33</sub>, respectively. Source data are provided as a Source Data file.

| Evolved construct (IgG) | IC <sub>50</sub> (pM) |
|-------------------------|-----------------------|
| 11                      | 251 ± 4.8             |
| 176                     | 201 ± 6.4             |
| 37                      | 136 ± 3.1             |
| 59                      | 177 ± 5.9             |
| 128                     | 1413 ± 4.2            |
| 72                      | 1911 ± 2.0            |
| 126                     | 5693 ± 4.5            |
| 130                     | 2063 ± 3.2            |
| 16                      | 935 ± 2.6             |
| 139                     | 649 ± 6.9             |
| WFL                     | 363 ± 2.4             |
| STT                     | 573 ± 4.0             |
| MEDI578                 | 36760 ± 2.8           |

**Supplementary Table 2:** IC<sub>50</sub> values of IgG<sub>WFL</sub>, IgG<sub>STT</sub> and the ten selected evolved variants binding to nerve growth factor (NGF) measured using an epitope competition assay (n = 3 technical repeats, error = s.e.m). IgG MEDI578 is the parent antibody subjected to affinity panning which generated IgG<sub>WFL</sub>. Source data are provided as a Source Data file.

| Residue | Computational tool |        |             |
|---------|--------------------|--------|-------------|
|         | CamSol             | SAP    | Aggrescan3D |
| F30     | -0.203             | -0.107 | 2.30        |
| W35     | -1.65              | 0.490  | 2.23        |
| F36     | -2.41              | 0.745  | 2.87        |
| I56     | -0.074             | 0.165  | 0.641       |
| I57     | 0                  | 0.192  | 0           |
| I59     | -1.50              | 0.71   | 0.64        |
| F62     | -1.087             | 1.10   | 2.52        |
| I110    | -0.053             | 0.56   | 0.722       |
| L112c   | -0.116             | 0.161  | 1.67        |
| K18     | -0.046             | -0.429 | -2.28       |
| N57     | -1.98              | -0.480 | 0.236       |
| I71     | 0.382              | -0.419 | 0.299       |

**Supplementary Table 3:** Analysis of hotspot residues using CamSol, SAP and Aggrescan3D. The numerical score is colour coded based on arbitrary cut-off values for each algorithm in line with **Fig. 5**: Structurally corrected CamSol, +1 indicates soluble and -1 indicates insoluble; SAP (using a 10 Å radius) where values > 0.5 and -0.5 are significant; and Aggrescan3D, where values > 1 and <-1 are significant. Source data are provided as a Source Data file.

|            |                                                                                                                                                                                                                                                                                                                                                                                                                                                                                                                                                                                                                                                                                                                                                                                                                                                                                                                                                                                                                                                                                                          |
|------------|----------------------------------------------------------------------------------------------------------------------------------------------------------------------------------------------------------------------------------------------------------------------------------------------------------------------------------------------------------------------------------------------------------------------------------------------------------------------------------------------------------------------------------------------------------------------------------------------------------------------------------------------------------------------------------------------------------------------------------------------------------------------------------------------------------------------------------------------------------------------------------------------------------------------------------------------------------------------------------------------------------------------------------------------------------------------------------------------------------|
| DNA        | <p> <u>ATGAGTATTCAACATTTCCGTGTCGCCCTTATCCCTTTTTTGCGGCATTTTGCCTTCCTGTTTTGC</u><br/> TCACCCAGAAACGCTGGTCAAAGTAAAAGATGCTGAAGATCAGTTGGGTGCACGAGTGGGTTAC<br/> ATCGAACTGGATCTCAACAGCGGTAAGATCCTTGAGAGTTTTCGCCCCGAAGAACGTTTTCCAAT<br/> GATGAGCACTTTTAAAGTTCTGCTATGTGGCGCGGTATTATCCCGTGTGACGCCGGGCAAGAGC<br/> AACTCGGTCGCCGCATACACTATTCTCAGAATGACTTGGTTGAGTACTACCAGTCACAGAAAAG<br/> CATCTTACGGATGGCATGACAGTAAGAGAATTATGCAGTGTGCCATAACCATGAGTGATAACAC<br/> TGCGGCCAACTTACTTCTGACAACGATCGGAGGACCGAAGGAGCTAACCGCTTTTTTGCACAACA<br/> TGGGGGATCATGTAACTCGCCTTGATCGTTGGGAACCGGAGCTGAATGAAGCCATACCAAACGA<br/> CGAGCGTGACACCACGATGCCTGCAGCAATGGCAACAACGTTGCGCAAATTAATACTGGCGAA<br/> CTAGGTGGTGGTGGTCTGGTGGTGGTGG<b>CTCGAG</b>CTCA<b>GGATCGGGGAGCGGTTCCGGAAGC</b><br/> <b>GGAGGAGGTGGTTCAGGCGGAGGTGGAAGC</b>TTGACTCTAGCTAGCCGGCAGCAGCTCATAGAC<br/> TGGATGGAGGCGGATAAAGTTGCAGGACCACTTCTGCGCTCGGCCCTCCGGCTGGCTGGTTTA<br/> TTGCTGATAAATCTGGAGCCGGTGAGCGTGGGTCTCGCGGTATCATTGCAGCACTGGGGCCAGA<br/> TGGTAAGCCCTCCCGTATCGTAGTTATCTACACGACGGGGAGTCAGGCAACTATGGATGAACGA<br/> AATAGACAGATCGCTGAGATAGGTGCCTCACTGATTAAGCATTGGTAA </p> |
| Amino Acid | <p> MSIQHFRVALIPFFAAFCLPVFAHPETLVKVKDAEDQLGARVGYIELDLNSGKILESFRPEERFPMST<br/> FKVLLCGAVLSRVDAGQEQLGRRIHYSQNDLVEYSPVTEKHLTDGMTVRELCSAAITMSDNTAANLLL<br/> TTIGGPKELTAFLHNMGDHVTRLDRWEPELNEAIPNDERDTTTPAAMATTLRKLTTGEL<b>GGGSGG</b><br/> <b>GGSSGSGSGSGSGGGGSGGGG</b>SLTASRQQLIDWMEADKVAGPLLRALPAGWFIADKSGAGER<br/> GSRGIIAALGPDGKPSRIVVIYTTGSQATMDERNRQIAEIGASLIKHW </p>                                                                                                                                                                                                                                                                                                                                                                                                                                                                                                                                                                                                                                                                                                                                   |

**Supplementary Table 4.** DNA and amino acid sequences of the  $\beta$ -lactamase-linker construct. The periplasmic signal sequence is in purple. The G/S-rich linker is shown in bold. The restriction sites *Xho*I and *Bam*HI are shown in blue and green, respectively. The start and stop codons are underlined.

| Construct          | Amino Acid Sequence                                                                                                                                                                                                                                                    |
|--------------------|------------------------------------------------------------------------------------------------------------------------------------------------------------------------------------------------------------------------------------------------------------------------|
| scFv WFL           | QVQLVQSGAEVKKPGSSVKVCKASGGTFWFGAFTWVRQAPGQGLEWMGGIPIFGLTNLAQNF<br>QGRVTITADESTSTVYMESSLRSEDTAVYYCARSSRIYDLNPSLTAYYDMVWVWQGTMTVSSGG<br>GSSGGGGSGGGGGAQSVLTQPPSVSAAPGQKVTISCSGSSSDIGNNYVSWYQQLPGTAPKLLIYD<br>NNKRPSGIPDRFSGSKSGTSATLGITGLQTDGDEADYYCGTWSSLSAWVFGGGTKLTVL |
| scFv STT           | QVQLVQSGAEVKKPGSSVKVCKASGGTFSTGAFTWVRQAPGQGLEWMGGIPIFGLTNLAQNF<br>QGRVTITADESTSTVYMESSLRSEDTAVYYCARSSRIYDLNPSLTAYYDMVWVWQGTMTVSSGG<br>GSSGGGGSGGGGGAQSVLTQPPSVSAAPGQKVTISCSGSSSDIGNNYVSWYQQLPGTAPKLLIYD<br>NNKRPSGIPDRFSGSKSGTSATLGITGLQTDGDEADYYCGTWSSLSAWVFGGGTKLTVL |
| GCSF               | MTPLGPASSLPQSFLKCLEQVRKIQGDGAALQEKLKCATYKLCHEPELVLLGHSLGIPWAPLSSCPSQ<br>ALQLAGCLSGLHSLFLYQGLLQALEGISPELGPGLDGLQDVADFATTIQQMEELGMAPALQPT<br>QGAMPAFASAFQRRAGGVLVASHLQSFLEVSRYRHLAQP                                                                                     |
| GCSF-C3            | MTPLGPASSLPQSFLKGLEQVRKIQGDGAALQEKLKCATYKLCHEPELVLLGHSLGIPRAPLSSCPSQ<br>ALRLAGCLSGLHSLLYQGLLQALEGISPELGPGLDGLQDVADFATTIQQMEELGMAPALQPT<br>QGAMPAFASAFQRRAGGVLVASHLQSFLEVSRYRHLAQP                                                                                      |
| Dp47d              | EVQLLESGGGLVQPGGSLRLSCAASGFTFSSYAMSWVRQAPGKGLEWVSAISGSGSTYYADSVK<br>GRFTISRDNKNTLYLQMNSLRAEDTAVYYCAKSYGAFDYWGQGLTVTVSS                                                                                                                                                 |
| HEL4               | EVQLLESGGGLVQPGGSLRLSCAASGFRISDEDMGWVRQAPGKGLEWVSSIYGPSGSTYYADSVK<br>GRFTISRDNKNTLYLQMNSLRAEDTAVYYCASALEPLSEPLGFWGQGLTVTVSS                                                                                                                                            |
| scFv Li33          | EVQLLESGGGLVQPGGSLRLSCAASGFTFSIYPMFWVRQAPGKGLEWVSWIGPSGGITKYADSVK<br>GRFTISRDNKNTLYLQMNSLRAEDTATYYCAREGHNDWYFDLWGRGTLTVSSGGGGSGGGGS<br>GGGGSGGGSDIQMTQSPGTLSPGERATLSCRASQSVSSYLAWYQQKPGQAPRLIYDASNRA<br>TGIPARFSGSGSTEFTLTISSLQSEDAVYYCQQYDKWPLTFGGGKVEIK              |
| V <sub>L</sub> JTO | NFMLNQPHSVSESPGKTVTISCTRSSGNIDSNYVQWYQQRPGSAPITVIYEDNQRPSGVPDRFAGS<br>IDRSSNSASLTISGLKTEDEADYYCQSYDARNVVFGGGTRLTVL                                                                                                                                                     |

**Supplementary Table 5.** Amino acid sequences of test proteins and their variants. Sequence differences between variant pairs are highlighted in yellow.

|     |                                                                                                                                                                                                                                                                                                                                                                                                                                                                                                                                                                                                                                                                                                                                                                                                                                                                                                                                                                                                                                                                                                                                                                                                                                                                                                                                                                                                                                                                                                                                                                                                                                                                                                                                                                                                                                                                                                                                                                         |
|-----|-------------------------------------------------------------------------------------------------------------------------------------------------------------------------------------------------------------------------------------------------------------------------------------------------------------------------------------------------------------------------------------------------------------------------------------------------------------------------------------------------------------------------------------------------------------------------------------------------------------------------------------------------------------------------------------------------------------------------------------------------------------------------------------------------------------------------------------------------------------------------------------------------------------------------------------------------------------------------------------------------------------------------------------------------------------------------------------------------------------------------------------------------------------------------------------------------------------------------------------------------------------------------------------------------------------------------------------------------------------------------------------------------------------------------------------------------------------------------------------------------------------------------------------------------------------------------------------------------------------------------------------------------------------------------------------------------------------------------------------------------------------------------------------------------------------------------------------------------------------------------------------------------------------------------------------------------------------------------|
| DNA | <p> <u>ATGAGTATTCAACATTTCCGTGTCGCCCTTATCCCTTTTTTGCGGCATTTTGCCTTCTGTTTTGC</u><br/> TCACCCAGAAACGCTGGTGAAAGTAAAAGATGCTGAAGATCAGTTGGGTGCACGAGTGGGTAC<br/> ATCGAACTGGATCTCAACAGCGTAAGATCCTTGAGAGTTTTCGCCCCGAAGAACGTTTTCCAAT<br/> GATGAGCACTTTTAAAGTTCTGCTATGTGGCGCGGTATTATCCCGTGTGACGCCGGGCAAGAGC<br/> AACTCGGTCGCCGCATACACTATTCTCAGAATGACTTGGTTGAGTACTCACCAGTCACAGAAAAG<br/> CATCTTACGGATGGCATGACAGTAAGAGAATTATGCAGTGTGCCATAACCATGAGTGATAACAC<br/> TGCGGCCAACTTACTTCTGACAACGATCGGAGGACCGAAGGAGCTAACCGCTTTTTGCACAACA<br/> TGGGGGATCATGTAACCGCCTTGATCGTTGGGAACCGGAGCTGAATGAAGCCATACCAAACGA<br/> CGAGCGTGACACCACGATGCCTGCAGCAATGGCAACAACGTTGCGCAAATTAACCTGGCGAA<br/> CTAGGTGGTGGTGGTTCTGGTGGTGGTGG<b>CTCGAG</b><u>C</u>CAGGTTCAGCTTGTGCAGAGCGGT<br/> GCGGAGGTCAAAAACCCGGCAGCTCTGTAAGTTAGCTGCAAAGCGAGTGGCGGT<br/> ACGTTTTGGTTGGGGCCTTACTTGGTTTCGCAAGCGCCGGGCCAGGGCTTGAATG<br/> GATGGGTGGCATTATCCCTATTTTCGGCCTCACAAACCTGGCGCAAACCTTCAAGGTC<br/> GCGTTACCATTACGGCGGACGAAAGCACCAGTACCGTCTATATGGAGCTGTCAAGCCT<br/> GCGCTCAGAAGACACCGCAGTT<b>TAATAA</b>TGTGCGGTAGCAGCCGATTTACGACTTGA<br/> ATCCTAGCCTCACAGCGTACTACGACATGGATGTGTGGGGGCAGGGCACCATGGTTAC<br/> GGTGTGAGTGGTGGTGGGAGCAGTGGTGGAGGTGGGTCCGGGGGCGGCGGGCGGGC<br/> CGCAAAGCGTATTAACCTAGCCGCCGAGCGTGAGCGCAGCCCCTGGGCAGAAAGTCAC<br/> CATTTGCAGCGGCTCCTCCAGCGATATCGGCAACAATTACGTGTCCTGGTATCAGC<br/> AGCTGCCTGGCACTGCGCCGAAGCTGTTGATTTATGACAACAATAAGCGTCCCTCGGGT<br/> ATTCCAGATCGTTTTCTGGCTCTAAAAGCGGGACATCAGCGACACTGGGCATCACCGG<br/> GCTGCAGACGGGGGATGAAGCCGATTACTGCGGGACCTGGGATAGTCCCTGAGC<br/> GCGTGGGTGTTTGGCGGGGGCACCAAACCTACCCTGCTG<b>GGATCCGGGAGCGGTTCCG</b><br/> <b>GAAGCGGAGGAGGTGGTTCAGGCGGAGGTGGAAGCT</b>TGACTCTAGCTAGCCGGCAGCAGCTC<br/> ATAGACTGGATGGAGGCGGATAAAGTTGCAGGACCACTTCTGCGCTCGGCCCTTCCGGCTGGCT<br/> GGTTTATTGCTGATAAATCTGGAGCCGGTGGAGCGTGGGTCTCGCGGTATCATTGCAGCACTGGG<br/> GCCAGATGGTAAGCCCTCCCGTATCGTAGTTATCTACACGACGGGGAGTCAGGCAACTATGGAT<br/> GAACGAAATAGACAGATCGCTGAGATAGGTGCCTCACTGATTAAGCATTGGTAA </p> |
|-----|-------------------------------------------------------------------------------------------------------------------------------------------------------------------------------------------------------------------------------------------------------------------------------------------------------------------------------------------------------------------------------------------------------------------------------------------------------------------------------------------------------------------------------------------------------------------------------------------------------------------------------------------------------------------------------------------------------------------------------------------------------------------------------------------------------------------------------------------------------------------------------------------------------------------------------------------------------------------------------------------------------------------------------------------------------------------------------------------------------------------------------------------------------------------------------------------------------------------------------------------------------------------------------------------------------------------------------------------------------------------------------------------------------------------------------------------------------------------------------------------------------------------------------------------------------------------------------------------------------------------------------------------------------------------------------------------------------------------------------------------------------------------------------------------------------------------------------------------------------------------------------------------------------------------------------------------------------------------------|

**Supplementary Table 6.** DNA sequence of the  $\beta$ -lactamase stop template. The periplasmic signal sequence is in purple. The G/S-rich linker is shown in bold. The restriction sites *XhoI* and *BamHI* are shown in blue and green, respectively. The start and stop codons are underlined. The position of the inserted stop codons are highlighted in red.

## Supplementary References

1. Dobson, C. L. *et al.* Engineering the surface properties of a human monoclonal antibody prevents self-association and rapid clearance in vivo. *Sci. Rep.* **6**, 38644 (2016).
